# Supplementary material
Source: bioRxiv or medRxiv preprint supplement (https://www.medrxiv.org/highwire/filestream/97947/field_highwire_adjunct_files/0/2020.09.21.20196592-1.pdf)
Supplement: Supplementary file [file 2020.09.21.20196592-1.pdf]

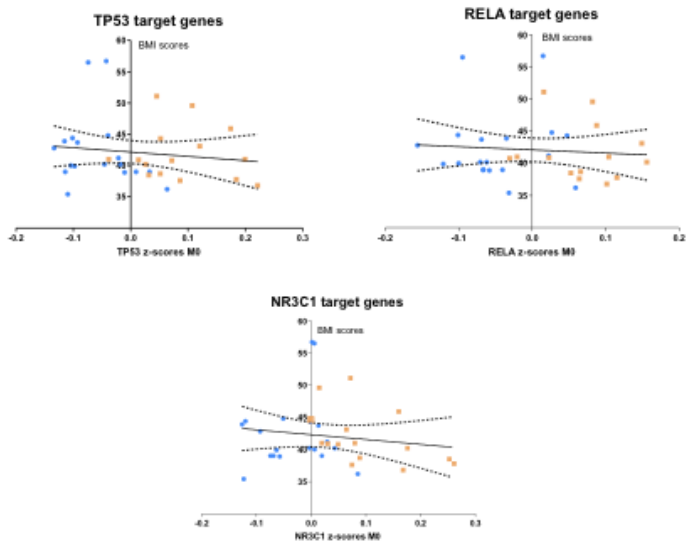

**Supplementary Fig.1:** TP53, RELA and NR3C1 pathways do not predict the body mass index of patients. Multivariate linear regression analyses. MDD patients (orange symbols), non-depressed patients (blue symbols)
